## Joint-level mechanics of the walk-to-run transition in humans

Neville, J. Pires<sup>1</sup>, Brendan, S. Lay<sup>1</sup> and Jonas Rubenson<sup>1\*</sup>

<sup>1</sup>School of Sport Science, Exercise and Health, The University of Western Australia, Crawley, WA, 6009, Australia

\* Author for correspondence:

Dr. Jonas Rubenson

School of Sport Science, Exercise and Health

The University of Western Australia

35 Stirling Hwy

Crawley, WA, 6009, Australia

Tel: 1 618 6488 5533; Fax: 1 618 6488 1039

Email: [Jonas.Rubenson@uwa.edu.au](mailto:Jonas.Rubenson@uwa.edu.au)

Running Title: gait transition triggers

Keywords: walk, run, gait transition, trigger, joint mechanics, locomotion

## Summary

Two commonly proposed mechanical explanations for the WRT include the prevention of muscular over-exertion (effort) and the minimisation of peak musculoskeletal loads and thus injury risk. The purpose of this study was to address these hypotheses at a joint level by analysing the effect of speed on discrete lower-limb joint kinetic parameters in humans across a wide range of walking and running speeds including walking above and running below the WRT speed. Joint work, peak instantaneous joint power, and peak joint moments in the sagittal and frontal plane of the ankle, knee and hip from 8 participants were collected for 10 walking speeds (30 – 120% of their WRT) and 10 running speeds (80 – 170% of their WRT) on a force-plate instrumented treadmill. Of the parameters analysed, three satisfied our statistical criteria of the ‘effort-load’ hypothesis of the WRT. Mechanical parameters that provide an acute signal (peak moment and peak power) were more strongly associated with the gait transition than parameters that reflect the mechanical function across a portion of the stride. We found that both the ankle (peak instantaneous joint power during swing) and hip mechanics (peak instantaneous joint power and peak joint moments in stance) can influence the transition from walking to running in human locomotion and may represent a cascade of mechanical events beginning at the ankle and leading to an unfavourable compensation at the hip. Both the ankle and hip mechanisms may contribute to gait transition by lowering the muscular effort of running compared to walking at the WRT speed. Although few of the examined joint variables satisfied our hypothesis of the WRT, most showed a general marked increase when switching from walking to running across all speeds where both walking and running are possible, highlighting the fundamental differences in the mechanics of walking and running. While not eliciting the WRT per se, these variables may initiate the transition between stable walking and running patterns. Those variables that were invariant of gait were predominantly found in the swing phase.

## Introduction

Why do we switch from walking to running to move faster? This seemingly simple question has received considerable attention yet, whilst several factors have been proposed as triggers for the walk-to-run transition (WRT), their mechanisms remain debated. For example, it has been argued that humans (Margaria et al., 1963; Mercier et al., 1994) and other animals (Hoyt and Taylor, 1981; Rubenson et al., 2004; Watson et al., 2011) switch between walking and running to minimize metabolic energy use. However, some studies in

humans have reported that the WRT occurs at a speed when it remains metabolically  
34 advantageous to walk, thus putting into question whether energy cost is the underlying  
determinant of the WRT (Hreljac, 1993a; Tseh et al., 2002). For example, dynamic systems  
36 theory acknowledges the importance of minimizing energy expenditure, however, views  
locomotor economy as a consequence of dynamic stability and not the cause of the transition  
38 *per se*. From a dynamical systems perspective, the WRT is influenced by non-specific control  
parameters that move the system from one stable coordination pattern to another, but does not  
40 prescribe these states. As such, the WRT may represent an abrupt shift from walking to  
running to avoid dynamic instability, initiated by one or more discrete mechanical variables,  
42 for example the increase in peak ankle power at the onset of running (Farris and Sawicki,  
2011a).

44 Alternatively, discrete mechanical variables may themselves be directly associated  
with gait transition, rather than only reflecting the system stability or energetics. Two such  
46 commonly proposed explanations for the WRT based on discrete mechanical variables  
include 1) the prevention of muscular over-exertion (effort) (Hreljac, 1995; Hreljac et al.,  
48 2001; Bartlett and Kram, 2008), and 2) the minimisation of peak musculoskeletal loads and  
therefore the chance of injury (Biewener and Taylor, 1986; Farley and Taylor, 1991; Hreljac  
50 et al., 2008). This can occur if variables associated with muscular effort and/or load become  
elevated when walking above the WRT but are lowered upon switching to running (referred  
52 to here as the ‘effort-load’ hypothesis of the WRT). In humans, the clearest example of these  
factors influencing gait transition have been identified at the ankle (Farris and Sawicki,  
54 2011b; Hreljac, 1995a; Hreljac et al., 2008; Prilutsky and Gregor, 2001; MacLeod et al.,  
2014). However, the prevalence of other joints [e.g. the hip, (Minetti et al., 1994)] and  
56 associated muscle groups affecting the WRT in humans may be obscured because of a lack of  
comprehensive information on the simultaneous individual mechanics of all the major lower  
58 leg joints across the gait cycle at speeds where both walking and running are possible.  
Furthermore, which discrete joint mechanical parameters that are most closely associated  
60 with gait transition are poorly understood, and in particular, whether joint loading, work, or  
power have varying influence on the WRT remains untested.

62 Although these forms of mechanical analyses at the level of the joints do not assess  
individual muscles directly, they do provide a means to comprehensively assess the end-  
64 effect of the lower-limb muscle functions. They also provide a powerful approach by which  
discrete muscular effort and mechanical loading hypotheses of gait transition can be tested

66 broadly across different joints and muscle groups, and afford further insight into the  
underlying mechanisms of gait transition. The purpose of this study was, therefore, to assess  
68 how discrete joint mechanics impacts the WRT by systematically measuring the effect of  
speed on lower-limb joint kinetics and mechanical energetics in humans across a wide range  
70 of walking and running speeds including walking above and running below the preferred  
WRT speed. We asked two main questions: 1. How is mechanical work, peak power and/or  
72 peak loading (moments) at the individual joints associated with the WRT? 2. Do the  
individual joints (ankle, knee and hip) affect the WRT differently? Furthermore, in order to  
74 better understand the mechanics of switching between walking and running, we also asked  
which joint work, power and moment parameters exhibit abrupt changes between walking  
76 and running, but that do not influence the WRT *per se*. Although not the central question of  
the present study, these parameters can inform motor control theories, such as dynamic  
78 systems theory, as they may represent the behavioural manifestation of higher order control.

In testing these questions we established statistical-based criteria for accepting a  
80 variable as satisfying the effort-load hypothesis for the WRT. We analysed variables that can  
provide a physiological signal for altering gait mechanics including: joint work, peak  
82 instantaneous joint power and both peak sagittal and frontal plane joint moments, the former  
being linked to muscle force required for body support and the latter being linked to lateral  
84 stability and ligament loading, and thus may be more closely related to joint injury  
mechanisms (Besier et al., 2001a; Besier et al., 2001b). We assessed how these mechanical  
86 parameters changed with respect to the stance- and swing-phases of gait independently (we  
only included those variables that represent the major action at the joints in these phases).

88

## Results

90 Example traces of the group mean joint moment and instantaneous power curves  
during walking and running at the WRT speeds are presented in Fig. 1. The peak moments  
92 and peak instantaneous powers during the stance and swing phases of walking and running  
that are used in our analyses are identified, as are the joint power bursts that define our joint  
94 work variables. Results from the speed/gait series analyses are presented below and group  
mean data are provided for each variable at each speed in the online supplementary material  
96 (Microsoft Excel).

### *Mechanical work*

98           The majority of joint work variables exhibited a statistically significant increase with  
100 speed, with the exception of the ankle stance negative work (see Table 1 for ANOVA  
102 statistics including speed main effects from both two-way and one-way *post hoc* analyses).  
The individual speeds identified as being significantly different between walking and running  
(*a priori* and *post hoc* analyses) are identified on Fig. 2.

104           No mechanical work parameters satisfied all the statistical requirements of the effort-  
106 load hypothesis of the WRT (see Materials and Methods). The line of best fit for the positive  
108 ankle swing work (Fig. 2D) during walking was found to increase above those of running at  
the WRT speed but did not exhibit a statistically higher value during walking compared to  
running at the WRT. Table 1 details the ANOVA results and the work variables that satisfied  
our definition of a general change between walking and running (gait main effect) but which  
were not identified as satisfying the effort-load hypothesis of gait transition.

### *Peak instantaneous joint powers*

110           The majority of instantaneous joint power variables exhibited a main effect of speed  
112 (ANOVA, Table 2) including both power generation and absorption (Fig. 3). The individual  
114 speeds identified as being significantly different between walking and running (*a priori* and  
*post hoc* analyses) are identified on Fig. 3. From these statistical analyses, the peak positive  
hip stance power and the peak positive ankle swing power were the only variables identified  
116 that satisfied all the statistical requirements of the WRT trigger (Fig. 3C-D). The line of best  
fit for the peak positive hip swing (flexion) power (Fig. 3F) during walking was found to  
118 increase above that of running close to the WRT speed, but did not exhibit a statistically  
higher value during walking compared to running at the WRT.

120           The summary of ANOVA results including gait main effects and gait-speed  
122 interaction effects on peak powers, and the peak power variables that satisfied our definition  
of a general change between walking and running (gait main effect) but that did not satisfying  
the effort-load hypothesis of gait transition are outlined in Table 2.

124

126

### *Peak joint moments*

128 The majority of peak joint moment variables increased with speed during walking,  
with the only exceptions being the peak knee stance abduction moments (Fig. 4 G) (see Table  
130 3 for ANOVA statistics including speed main effects from both two-way and one-way *post*  
*hoc* analyses). The individual speeds identified as being significantly different between  
132 walking and running (*a priori* and *post hoc* analyses) are identified on Fig. 4.

The peak hip stance flexion moment satisfied the criteria for the WRT trigger (Fig.  
134 4C, positive values; Table 3). The line of best fit for the peak hip stance extension moment  
(Fig. 4C, negative values; Table 3) increased above that of running at the WRT, but did not  
136 exhibit a significantly larger value for walking compared to running at the WRT after the  
Benjamini correction for multiple comparisons. The other peak joint moments did not satisfy  
138 the criteria for the effort-load hypothesis of the WRT. The summary of ANOVA results  
including gait main effects and gait-speed interaction effects on peak joint moments, and the  
140 peak joint moment variables that satisfied our definition of a general change between walking  
and running (gait main effect) but that did not satisfying the effort-load hypothesis of gait  
142 transition are outlined in Table 3.

### **Discussion**

144 Humans and other terrestrial animals spontaneously switch from a walking to running  
gait as they increase locomotor speed. This study aimed to determine the extent by which  
146 discrete mechanical variables at the individual joints that can affect muscular effort and  
musculoskeletal loads are associated with the WRT in humans. The majority of the examined  
148 joint parameters showed a general marked increase between walking and running at speeds  
where both walking and running are possible. However, out of the parameters examined, only  
150 three satisfied our statistical criteria of the effort-load hypothesis of the WRT. Mechanical  
parameters that provide an acute signal (peak moments and peak power) were more strongly  
152 associated with the gait transition than mechanical work parameters that reflect the muscular  
function across a portion of the stride, and were present both at the ankle and the hip.

154 *Which discrete joint mechanical variables might affect the walk-to-run transition?*

Previous studies have identified discrete joint kinematics (Hreljac, 1995; Minetti et  
156 al., 1994), joint moments (Prilutsky and Gregor, 2001) and peak joint power (Hreljac et al.,  
2008) that may be linked to the WRT. Because these studies either focused on a sub-set of

158 joints or mechanical variables separately, it is difficult to deduce from them whether each  
parameter is equally important in the WRT. The current study's comprehensive inverse  
160 dynamic analyses indicate that various joint-level mechanical variables are linked to the  
WRT including both peak joint power and peak joint moments. This might result, in part,  
162 because these parameters are each associated with the same muscular actions. For example  
the required increase in peak positive hip stance power (Fig. 3C) may occur partly due to the  
164 increase in peak hip stance flexion moments (Fig. 4C, positive values), as joint power is a  
function of joint moment.

166 It is nevertheless interesting that all of the mechanical variables satisfying the effort-  
load hypothesis of the WRT identified in this study (peak joint power and peak joint  
168 moments) are those that can provide an acute physiological signal. This is consistent with the  
theory that gait transition occurs spontaneously, is initiated within a single stride (Segers et  
170 al., 2013), and is triggered by discrete variables that can be acutely sensed. In contrast, joint  
work reflects the joint's mechanical function over a portion of the stride. Similar to the  
172 overall metabolic rate, the longer time over which these variables fluctuate might preclude  
them from causing the transition step itself [although AMP-activated protein kinase (Winder,  
174 2001) and/or other cellular mechanisms (Clanton et al., 2013) may provide acute sensing of  
the energy/work state of a muscle]. On the other hand, the increase in joint mechanical work  
176 at the ankle and hip during fast walking above that required for running offer a reasonable  
explanation, together with instantaneous peaks in joint power and moments, why humans  
178 avoid walking at these speeds and instead choose to either walk slower or run faster. They  
might also help explain, in part, the higher cost of walking compared to running at fast  
180 walking speeds.

It is likely that the variables consistent with the effort-load hypothesis identified in  
182 this study reflect local muscle-level stimuli. These local joint-level effects were, however,  
not contained to a single phase of the gait cycle. Variables linked to the WRT were identified  
184 both in the swing phase (peak positive ankle dorsi-flexion power) and in the stance-phase  
(peak hip power and flexion moments). Furthermore, the peak hip flexion moments and peak  
186 hip power occur at different times during stance. Given that gait transition is likely triggered  
within a short time frame, it remains unclear whether one of these variables is more strongly  
188 associated with the transition, whether each independently affects the WRT at different times,  
or whether they possibly act cumulatively.



190 *Evidence for both ankle- and hip-based mechanics influencing the walk-to-run transition*

192 Several studies have identified effort (Hreljac, 1995; Hreljac et al., 2001; Hreljac et  
al., 2008), or fatigue (Malcolm et al., 2009; Segers et al., 2007) in the ankle dorsi-flexors  
during the swing phase as a main factor influencing the WRT. The findings of this study  
194 supports this hypothesis, providing further evidence that ankle dorsi-flexion in swing is a key  
mechanism affecting the transition from walking to running. Indeed, this study found that the  
196 peak swing-phase dorsi-flexion power (Fig. 3D) satisfies the effort-load hypothesis of the  
WRT transition, with peak power values during walking exceeding those of running at the  
198 WRT speed (MacLeod et al., 2014). Our results for ankle swing-phase dorsi-flexion work  
(Fig. 2D) further indicate that ankle dorsi-flexion mechanics become unfavourable at walking  
200 speeds beyond the WRT. It is plausible that the high peak joint power and work are the  
underlying mechanisms leading to dorsi-flexion fatigue at fast walking speeds and that the  
202 reduction of these variables upon switching to running mitigates the fatigue and effort sensed  
in the muscles.

204 It has also been argued that stance-phase plantarflexion is a factor contributing to the  
WRT. Neptune and Sasaki (2005), and more recently Arnold et al. (2013) showed in  
206 simulation studies that the ability to generate force is compromised at fast walking speeds  
because of sub-optimal force-length-velocity characteristics of the triceps surae muscles.  
208 Switching to running allowed these muscles to function at a more favourable length and  
velocity, thus increasing their force capacity. More direct evidence for this has recently been  
210 found by combining ultrasound imaging and gait analysis, in which the velocity of the medial  
gastrocnemius fascicles has been identified as limiting force and power production during  
212 walking at the WRT speed (Farris and Sawicki, 2011a). Our speed-series joint-level analysis  
provides further support for this theory, whereby a plateau in peak instantaneous positive  
214 power and plantarflexion moments occurs above the WRT (Fig. 3A, 4A, negative values).  
The switch to running leads to a marked increase in ankle joint power and plantarflexion  
216 moments (Fig. 3A, 4A, negative values) and is in agreement with the higher estimated triceps  
surae muscle force and power during running at the WRT speed (Neptune and Sasaki, 2005;  
218 Farris and Sawicki, 2011a; Arnold et al., 2013). We cannot rule out, however, that the  
combination of the limitation in plantarflexion torque and dorsiflexion fatigue may contribute  
220 to the loss of local dynamic stability at the ankle joint when walking at speeds beyond the  
WRT (Jordan et al., 2009), and may together reflect a dynamic systems determinant of the  
222 WRT as opposed to a discrete ankle joint determinant.



In addition to the aforementioned ankle mechanisms, our study also identified novel discrete hip-based mechanical variables that are associated with the WRT. The increase in peak positive hip stance power and peak flexion moments (Fig. 3C and 4C, positive values) during walking to values above those required for running at the WRT may contribute to the transition to a running gait. It is intriguing to consider whether the sharp increase in the peak positive hip stance-phase power beyond the WRT speed (Fig. 3C) occurs because of the inability of the ankle to produce sufficient stance-phase peak power and joint moments (Fig. 3A and 4A). In this regard, the trigger for the WRT may, in part, be the result of a cascade of mechanical events beginning at the ankle and leading to an unfavourable compensation at the hip, both of which may provide the critical signal for altering gait. Unlike Prilutsky and Gregor (2001) we did not observe a clear unfavourable effect on swing-phase joint moments at fast walking speeds. This may be due to the moderately smaller range of walking speeds in the present study due to the difficulty of our subjects to maintain faster walking speeds. That hip swing-phase mechanics might influence the WRT was, however, supported by the trend of greater peak hip flexion joint power in walking compared to running above the WRT speed (Fig. 3F).

Together, these results suggest that the switch between walking and running may occur not only to reduce effort in ankle muscles, but also in the hip musculature. Some previous support for a hip-based mechanism affecting the WRT can be found from electromyography analyses of the hip muscles (rectus femoris and biceps femoris) at walking and running speeds spanning the WRT speed (Prilutsky and Gregor, 2001). Furthermore, simulation studies in which individual muscle mechanics were predicted for walking and running at and above and below the WRT indicate favourable reductions in peak power and work in hip muscle fibres as a result of switching to running (Sasaki and Neptune, 2006a, 2006b), although this has yet to be shown experimentally in humans. Interestingly, the redistribution of average mechanical power from the hip to the ankle that accompanies the reduction in hip work at the WRT has been suggested to contribute to the greater locomotor efficiency of running (Farris and Sawicki, 2011b). This may occur due the purported greater plantarflexor efficiency during running, and might also contribute to gait selection.

252

254

### *Is injury avoidance a factor in human gait transition?*

256 Whether the elevation in peak hip sagittal plane joint moments (Fig. 4C) would  
influence the WRT due to an injury reduction mechanism [as has been suggested in horses to  
258 reduce tendon loads, (Farley and Taylor, 1991)] is questionable. The increased hip flexion  
and extension moments are most likely accompanied by an increase in muscle force that,  
260 while potentially increasing the effort of locomotion, are at levels that are not expected to  
pose any significant musculoskeletal injury risk.

262 More likely to be linked with injury mechanisms are the frontal plane loads at the  
knee (Besier et al., 2001a; Besier et al., 2001b) and the hip. The present study provides  
264 among the first measurements of the response of non-sagittal loading at these joints across  
speed. Interestingly, while the abduction loading at the knee and hip increase at the same rate  
266 with speed during both walking and running, the load level is higher during running at all  
speeds where both gaits were analysed (Fig. 4). Running may therefore place the joints at  
268 larger risk of injury in general, but there is no evidence from our study that frontal plane  
loading *per se* influences the WRT in a manner to specifically reduce injury risk at the WRT  
270 speed.

### *General effect of gait transition*

272 Whether joint mechanical differences between walking and running are general across  
all speeds where walking and running are possible, or whether they arise due to a speed  
274 related effect has not been extensively examined. Our analysis found that most of the joint  
parameters in both the sagittal and frontal planes exhibited a marked increase with a shift  
276 from walking to running, both below and above the WRT. Furthermore, the majority of  
variables lacked an interaction effect between gait and speed (Tables 1-3). These findings  
278 suggest that, overall, there is an increase in the joint mechanical variables between walking  
and running that are largely unaffected by speed. Interestingly, those variables that were  
280 invariant of gait were predominantly found in the swing phase (Table 1-3). That differences  
in joint mechanics between walking and running are more predominant in the stance-phase of  
282 gait is consistent with the body centre-of-mass paradigms of walking and running (inverted  
pendulum *vs.* spring mass), which are dictated primarily by stance dynamics (Saibene and  
284 Minetti, 2003). We also found some joint variables at the hip and the ankle that exhibited  
speed-dependent differences between walking and running. For example, the ankle swing-  
286 phase work (Fig. 2D), and the peak positive hip stance- and swing-phase flexion power (Fig.

3C and F) and stance-phase moments (Fig. 4C) all lacked a main effect of gait but exhibited  
288 an interaction effect between gait and speed (Table 1-3). In these variables there was either a  
290 difference between gaits only at faster speeds, or the differences were in opposite direction  
above vs. below the WRT. In this latter scenario, these variables might help explain both the  
WRT as well as the run-to-walk transition.

292 While the general increase in these joint parameter magnitudes alone may not explain  
the WRT, they may however reflect which joint variables are responsible for initiating the  
294 transition between stable patterns of coordination (walking/running). As such, while not  
affecting the WRT *per se*, they may represent the key variables underpinning a dynamic  
296 systems interpretation of the WRT and may be representative of the central motor plan for  
moving between attractor states and avoiding system instability.

### 298 *Limitations*

Our joint-level inverse dynamic analyses represent the net effect of all muscles and  
300 structures that span the joints. As has been outlined previously (Sasaki et al., 2009), inverse  
dynamic analyses do not necessarily reflect the mechanics of individual muscles. We have  
302 not taken into account co-contraction between antagonist muscles, force sharing between  
synergist muscles or the distribution of work and power between muscle fibres and tendon. It  
304 is also important to stress that our criteria for the effort-load hypothesis of the WRT to be  
satisfied is based on the statistical identification of a unique increase in a parameter during  
306 walking compared to running at the WRT. This was the case when a parameter for walking  
first increases above running at the WRT. Whilst these criteria are designed to detect a unique  
308 event at the WRT, we cannot rule out that a variable reaches a critical value that influences  
gait transition without being uniquely identifiable at the WRT speed using the above criteria.  
310 They also do not identify other mechanisms that may influence gait transition, such as a  
restricted capacity for stance-phase peak ankle power and moments output that were evident  
312 in our analysis of joint mechanics (Fig. 3A and Fig. 4A). Finally, our analysis of the WRT  
does not specifically assess whether non-specific control parameters, which may be reflected  
314 in our discrete joint measurements, are responsible for the WRT (rather than the discrete  
variables themselves).

316

318 *Conclusion*

320 Discrete joint-level mechanisms at both the ankle and hip that are thought to increase  
321 muscular effort have been identified as being associated with the WRT in humans. Of the  
322 examined variables, only those that provide an acute signal satisfied our effort-load  
323 hypothesis of the WRT. We hypothesise that the WRT in humans is dictated, in part, by a  
324 limitation in ankle moment and power generation that results in a compensation at the hip  
325 that increases the effort in hip muscles above that which is required during running. Finally,  
326 our analyses suggest that the differences in joint mechanics between walking and running in  
327 most joint-level parameters are consistent across different speeds where walking and running  
328 are both feasible gaits.

328 **Materials and Methods**

*Subjects*

330 8 healthy and recreationally active subjects ( $m = 4$ ,  $f = 4$ ), with no history of major  
331 lower-limb injury were recruited for this study (age:  $24.8 \pm 1.8$  years; height:  $170.0 \pm 9.4$  cm;  
332 mass:  $69.6 \pm 13.2$  kg, mean  $\pm$  S.D.). All testing procedures were approved by the Human  
333 Research Ethics Committee of the University of Western Australia. Written informed consent  
334 was obtained from all subjects.

*Walk-to-run gait transition speed*

336 All subjects were accustomed to running on treadmills and were initially familiarized  
337 to walk and run on a force-plate instrumented split-belt treadmill (Bertec, Columbus, OH,  
338 USA). The subject's preferred WRT speed was determined following a protocol similar to  
339 those of Hreljac (1993a,b) and Bartlett and Kram (2008). The subjects walked at randomized  
340 speeds ranging from 1.5 to 2.5  $\text{m}\cdot\text{s}^{-1}$  at intervals of 0.1  $\text{m}\cdot\text{s}^{-1}$  for approximately 30 seconds to  
341 one minute per speed. At each speed the subjects were instructed to voluntarily choose  
342 between walking and running and were allowed to switch between gaits. The slowest speed  
343 where the subjects confirmed running to be their 'most comfortable' gait was selected as the  
344 WRT speed. This was repeated three times and the subject's range and average WRT speed  
345 was determined (group average  $2.00 \pm 0.09$   $\text{m}\cdot\text{s}^{-1}$ , ranging from 1.90 to 2.10  $\text{m}\cdot\text{s}^{-1}$ ).

346 *Three-dimensional (3-D) gait analysis*

Experiments were performed on a split belt force-plate treadmill (Bertec, Columbus, OH, USA). Subjects walked at speeds ranging from 30% to 120% of their WRT speed (0.5 to 2.5 m.s<sup>-1</sup>) and ran at speeds ranging from 80% to 170% (1.5 to 3.5 m.s<sup>-1</sup>) of their WRT. For both walking and running, speed increments of 10% were analysed with the subject walking/running at a set speed for at least one minute. Five speeds spanning 80 – 120% of the WRT were performed for both walking and running. The walking and running speeds were randomized to prevent any order effects. Five strides per subject per speed were analysed where the subject maintained their anterior-posterior and medial-lateral position on the treadmill. Individual strides where gait was spontaneously changed between walking and running were not analysed for this study.

Three-dimensional (3-D) ground reaction forces (2000 Hz) and marker position data (250 Hz; 8-camera VICON MX motion-analysis system VICON OxfordMetrics, Oxford, UK) were captured and integrated in Vicon Nexus data acquisition suite (version 1.8.3). Retroreflective markers were placed either on bony landmarks or as part of triad-marker clusters. Single markers were placed on the left and right anterior superior iliac spines, left and right posterior superior iliac spines, left and right head of first and fifth metatarsals, and left and right calcaneus. Triad-marker clusters were placed on the left and right thigh and leg. Three-dimension kinematic and inverse dynamic calculations were computed in VICON Nexus and Bodybuilder (VICON, Oxford Metrics, Oxford, UK) in accordance with the procedures established in Besier et al., (2003), including a functional knee axis and joint center (mean helical axis) and a functional hip center (sphere-fit) calculation. Prior to inverse dynamic modelling, marker position data was filtered using a fourth-order, 12 Hz (walking) and 8 Hz (running) low-pass Butterworth filter, with the filter frequencies selected by performing a residual analysis of filtered vs. unfiltered data (MATLAB, The Mathworks, Natick, MA). Ground reaction force signals were filtered at the same frequency as the kinematic data to prevent joint moment artifacts (Kristianslund et al., 2012).

#### *Joint moments and instantaneous joint power calculations*

Joint moments were expressed in the distal segment anatomical coordinate systems as per Besier et al. (2003). Only flexion/extension and adduction/abduction joint moments were used for WRT transition analyses because of the high variability in the long-axis joint loading. Joint powers were computed as the net power across all three joint planes. Joint moments and powers were computed for the right leg and both normalized to body mass (N

380 kg<sup>-1</sup> and W kg<sup>-1</sup>, respectively). Numerical values of the peak joint moments and powers were  
initially identified using Matlab (The MathWorks, Natick, MA). Secondary visual inspection  
382 identified whether the peak joint moments and instantaneous peak joint powers corresponded  
to the physiologically relevant phases of the gait cycle (see Fig. 1).

384

#### *Joint work*

386 Positive and negative joint work ( $W_{ji}^+$ ,  $W_{ji}^-$ ) were calculated for the ankle, knee and  
hip from the positive and negative values of the instantaneous joint power curves ( $P_{ji}^+$ ,  $P_{ji}^-$ ),  
388 respectively:

$$W_{ji}^+ = \int_{t_i}^{t_f} P_{ji}^+ dt, \quad W_{ji}^- = \int_{t_i}^{t_f} P_{ji}^- dt \quad (1)$$

390 The work from the individual joints (Eq. 1) was computed for the stance and swing  
phases independently. Work was normalized to body mass (J kg<sup>-1</sup>). When clear bursts of  
392 positive and/or negative work in the gait phase (stance / swing) were produced separately  
under net flexion and extension joint moments, both the individual flexion and extension  
394 work was computed (Fig. 1). This included positive hip joint work produced during the  
swing and stance phases, negative work at the hip in stance, negative work at the knee in  
396 swing, and the positive work at the ankle in swing. We report the flexion or extension work  
depending on which parameter represents the primary function of the joint in the gait phase  
398 (see Fig. 1).

#### *Testing of the 'effort-load' hypothesis for mechanical variables.*

400 Similar to Hreljac (1993b, 1995), we defined a set of criteria for a mechanical variable  
402 to satisfy the effort-load hypothesis of the WRT. Our analysis is based on the hypothesis that  
the WRT occurs when an 'undesirable' discrete variable surpasses a certain threshold value  
404 with increasing walking speed and is lowered by switching to running. A mechanical variable  
satisfied the effort-load hypothesis of the WRT if it increased with walking speed and first  
406 became larger during walking compared to running at the WRT speed such that switching  
gaits results in a favourable reduction in that variable. This definition is consistent with the  
408 criteria of Hreljac (1993b, 1995) whereby a mechanical "trigger" for the WRT is required to

410 increase with walking speed and undergo an abrupt decrease upon switching to running, but  
412 with the addition that the stimulus for lowering the variable first occurs at the WRT speed. To  
414 assess these criteria of the effort-load hypothesis we first examined the relationships between  
416 gait and speed using a two-way (gait: walking and running) by five repeated-measures  
418 (speed: 80%, 90%, 100%, 110% and 120% of WRT speed) analysis of variance (ANOVA;  
420 SPSS version 21). Significant main effects of speed and gait were assessed ( $p < 0.05$ ) and  
422 adjusted for the false discovery rate arising from multiple comparisons (Benjamini  
424 adjustment; Benjamini & Hochberg, 1995). The variable was deemed to increase with  
walking speed when a main effect of speed was detected, or in the event that an interaction  
effect between speed and gait existed, when a *post hoc* one-way ANOVA limited to walking  
data exhibited a main effect of speed. Secondly, *a priori* tests were used to establish those  
speeds where walking data were significantly greater than the running data. Because our  
criteria asked specifically when the walking data first became greater than the running data  
we performed a one-tailed paired sample t-test at each speed ( $p < 0.05$  with Benjamini  
multiple comparison adjustment).

#### 424 *General joint mechanical changes between walking and running at different speeds*

We also determined those variables that were generally affected by switching between  
426 a walking and running gait, but which did not satisfy the effort-load hypothesis *per se*.  
These variables demonstrated a shift between walking and running gaits at the WRT and  
428 other speeds where walking and running were compared. In order to determine if gait had a  
general effect on the biomechanical variables tested we used the two-way repeated-measures  
430 ANOVA described above to assess gait and speed main and interaction effects ( $p < 0.05$  with  
Benjamini multiple comparison adjustment). Variables that exhibited a main effect of gait  
432 were deemed to undergo a generalized modification between walking and running. When an  
interaction effect between gait and speed was found, *post hoc* tests were used to identify  
434 significant differences between the walking and running data at individual speeds (two-tailed  
paired sample t-test;  $p < 0.05$  with Benjamini multiple comparison adjustment).

436

### **Symbols and Abbreviations**

438 WRT, walk-to-run transition;  $P_{j_i}^+$ ,  $P_{j_i}^-$ , positive/negative instantaneous joint power;  $W_{j_i}^+$ ,  
 $W_{j_i}^-$ , positive/negative joint work.



440 **References**

- 442 **Arnold, E. M., Hamner, S. R., Seth, A., Millard, M. and Delp, S. L.** (2013). How muscle fiber lengths and velocities affect muscle force generation as humans walk and run at different speeds. *J. Exp. Biol.* **216**, 2150–60.
- 444 **Bartlett, J. L. and Kram, R.** (2008). Changing the demand on specific muscle groups affects the walk-run transition speed. *J. Exp. Biol.* **211**, 1281–8.
- 446 **Benjamini, Y. and Hochberg, Y.** (1995). Controlling the False Discovery Rate: A Practical and Powerful Approach to Multiple Testing. *J R Stat. Soc* **57**, 289–300.
- 448 **Besier, T. F., Lloyd, D. G., Ackland, T. R. and Cochrane, J. L.** (2001a). External loading of the knee joint during running and cutting maneu. *Med. Sci. Sport. Exerc.* **33**, 1176–1181.
- 450
- 452 **Besier, T. F., Lloyd, D. G., Ackland, T. R. and Cochrane, J. L.** (2001b). Anticipatory effects on knee joint loading during running and cutting maneuvers. *Med. Sci. Sport. Exerc.* **33**, 1176–1181.
- 454 **Besier, T. F., Sturneiks, D. L., Alderson, J. A. and Lloyd, D. G.** (2003). Repeatability of gait data using a functional hip joint centre and a mean helical knee axis. *J. Biomech.* **36**, 1159–1168.
- 456
- 458 **Biewener, a a and Taylor, C. R.** (1986). Bone strain: a determinant of gait and speed? *J. Exp. Biol.* **123**, 383–400.
- 460 **Clanton, T. L., Hogan, M. C. and Gladden, L. B.** (2013). Regulation of cellular gas exchange, oxygen sensing, and metabolic control. *Compr. Physiol.* **3**, 1135–90.
- 462 **Farley, C. T. and Taylor, C. R.** (1991). A mechanical trigger for the trot-gallop transition in horses. *Science* **253**, 306–8.
- 464 **Farris, D. J. and Sawicki, G. S.** (2011a). The mechanics and energetics of human walking and running: a joint level perspective. *J. R. Soc. Interface* **9**, 110–8.
- 466 **Farris, D. J. and Sawicki, G. S.** (2011b). Human medial gastrocnemius force-velocity behavior shifts with locomotion speed and gait. *Proc. Natl. Acad. Sci. U. S. A.* **109**, 977–82.
- 468 **Hoyt, D. and Taylor, C.** (1981). Gait and the energetics of locomotion in horses. *Nature* **292**, 239–240.
- 470 **Hreljac, A.** (1993a). Preferred and Energetically optimal gait transition speeds in human locomotion. *Med. Sci. Sport. Exerc.* **25**, 1158–1162.
- 472 **Hreljac, A.** (1993b). Determinants of the gait transition speed during human locomotion: kinetic factors. *Gait Posture* **1**, 217–223.

- 474 **Hreljac, A.** (1995a). Determinants of the gait transition speed during human locomotion:  
kinematic factors. *Biomechanics* **28**, 669–677.
- 476 **Hreljac, A.** (1995b). Effects of physical characteristics on the gait transition speed during  
human locomotion. *Hum. Mov. Sci.* **14**, 205–216.
- 478 **Hreljac, A., Arata, A., Ferber, R., Mercer, J. A. and Row, B.** (2001). An  
Electromyographical Analysis of the Role of Dorsiflexors on the Gait Transition During  
480 Human Locomotion. *J. Appl. Biomech.* **17**, 287–296.
- Hreljac, A., Imamura, R. T., Escamilla, R. F., Edwards, W. B. and MacLeod, T.** (2008).  
482 The relationship between joint kinetic factors and the walk-run gait transition speed  
during human locomotion. *J. Appl. Biomech.* **24**, 149–57.
- 484 **Jordan, K., Challis, J. H., Cusumano, J. P. and Newell, K. M.** (2009). Stability and the  
time-dependent structure of gait variability in walking and running. *Hum. Mov. Sci.* **28**,  
486 113–28.
- Kristianslund, E., Krosshaug, T. and van den Bogert, A. J.** (2012). Effect of low pass  
488 filtering on joint moments from inverse dynamics: implications for injury prevention. *J.*  
*Biomech.* **45**, 666–71.
- 490 **MacLeod, T. D., Hreljac, A. and Imamura, R.** (2014). Changes in the preferred transition  
speed with added mass to the foot. *J. Appl. Biomech.* **30**, 95–103.
- 492 **Malcolm, P., Segers, V., Van Caekenberghe, I. and De Clercq, D.** (2009). Experimental  
study of the influence of the m. tibialis anterior on the walk-to-run transition by means  
494 of a powered ankle-foot exoskeleton. *Gait Posture* **29**, 6–10.
- Margarita, R., Cerretelli, P., Aghemo, P. and Sassi, G.** (1963). Energy cost of running. *J.*  
496 *Appl. Physiol.* **18**, 367–70.
- Mercier, J., Gallais, D. Le, Durand, M., Goudal, C., Micallef, J. P. and Prefaut, C.**  
498 (1994). Energy Expenditure and Cardiorespiratory Responses at the Transition Between  
Walking and Running. *Eur. J. Appl. Physiol.* 525–529.
- 500 **Minetti, A. E., Ardigo, L. P. and Saibene, F. P.** (1994). The transition between walking and  
running in humans: metabolic and mechanical aspects at different gradients. *Acta*  
502 *Physiol. Scand.* **150**, 315–23.
- Neptune, R. R. and Sasaki, K.** (2005). Ankle plantar flexor force production is an important  
504 determinant of the preferred walk-to-run transition speed. *J. Exp. Biol.* **208**, 799–808.
- Prilutsky, B. I. and Gregor, R. J.** (2001). Swing- and support-related muscle actions  
506 differentially trigger human walk-run and run-walk transitions. *J. Exp. Biol.* **204**, 2277–  
87.
- 508 **Rubenson, J., Heliam, D. B., Lloyd, D. G. and Fournier, P. a** (2004). Gait selection in the  
ostrich: mechanical and metabolic characteristics of walking and running with and  
510 without an aerial phase. *Proc. Biol. Sci.* **271**, 1091–9.

- 512 **Sasaki, K. and Neptune, R. R.** (2006a). Differences in muscle function during walking and  
running at the same speed. *J. Biomech.* **39**, 2005–13.
- 514 **Sasaki, K. and Neptune, R. R.** (2006b). Muscle mechanical work and elastic energy  
utilization during walking and running near the preferred gait transition speed. *Gait  
Posture* **23**, 383–90.
- 516 **Sasaki, K., Neptune, R. R. and Kautz, S. A.** (2009). The relationships between muscle,  
external, internal and joint mechanical work during normal walking. *J. Exp. Biol.* **212**,  
518 738–44.
- 520 **Segers, V., Lenoir, M., Aerts, P. and De Clercq, D.** (2007). Influence of M. tibialis anterior  
fatigue on the walk-to-run and run-to-walk transition in non-steady state locomotion.  
*Gait Posture* **25**, 639–47.
- 522 **Segers, V., De Smet, K., Van Caekenberghe, I., Aerts, P. and De Clercq, D.** (2013).  
Biomechanics of spontaneous overground walk-to-run transition. *J. Exp. Biol.* **216**,  
524 3047–3054.
- 526 **Tseh, W., Bennett, J., Caputo, J. L. and Morgan, D. W.** (2002). Comparison between  
preferred and energetically optimal transition speeds in adolescents. *Eur. J. Appl.  
Physiol.* **88**, 117–21.
- 528 **Watson, R. R., Rubenson, J., Coder, L., Hoyt, D. F., Propert, M. W. G. and Marsh, R.  
L.** (2011). Gait-specific energetics contributes to economical walking and running in  
530 emus and ostriches. *Proc. Biol. Sci.* **278**, 2040–6.
- 532 **Winder, W. W.** (2001). Energy-sensing and signaling by AMP-activated protein kinase in  
skeletal muscle. *J. Appl. Physiol.* **91**, 1017–1028.

534

### Author Contributions

- 536 N.J.P and J.R. designed and conducted the experiment. N.J.P., B.S.L. and J.R. analysed and  
interpreted the data. N.J.P. and J.R. drafted the manuscript. N.J.P., B.S.L. and J.R. edited and  
538 revised the manuscript and approved the submitted version.

### Competing Interests

- 540 No competing interests declared

### Funding

- 542 This work was supported by an Australian Postgraduate Award scholarship to N.J.P.

## **Acknowledgements**

544 The authors would like to thank James J. Dunne, Sarah M. Stearne, Luqman Aziz and Kirsty  
A. McDonald for providing assistance with data collection and analysis, Tony Roby and  
546 Jared Issott for assistance with equipment development and maintenance and all of the  
participants for volunteering their time to this study.

Table 1. Joint work

| Variable                             | Two-way ANOVA    |                  |                  | One-way ANOVA    |              |
|--------------------------------------|------------------|------------------|------------------|------------------|--------------|
|                                      | Gait             | Speed            | Interaction      | Walking          | Running      |
| Ankle stance (positive) *            | <b>&lt;0.001</b> | <b>&lt;0.001</b> | 0.171            |                  |              |
| Ankle stance (negative) *            | <b>&lt;0.001</b> | 0.654            | <b>0.004</b>     | <b>0.005</b>     | 0.080        |
| Knee stance (negative) *             | <b>0.002</b>     | <b>&lt;0.001</b> | 0.363            |                  |              |
| Hip stance ext. (positive) *         | <b>&lt;0.001</b> | <b>&lt;0.001</b> | <b>&lt;0.001</b> | <b>&lt;0.001</b> | <b>0.024</b> |
| Hip stance flex. (negative)          | 0.442            | 0.165            | 0.611            |                  |              |
| Ankle swing dorsi-flex<br>(positive) | 0.040            | <b>&lt;0.001</b> | <b>&lt;0.001</b> | <b>&lt;0.001</b> | <b>0.001</b> |
| Knee swing flex. (negative)          | 0.338            | <b>&lt;0.001</b> | 0.536            |                  |              |
| Hip swing flex. (positive) *         | <b>0.023</b>     | <b>&lt;0.001</b> | 0.943            |                  |              |

P values for two-way ANOVA main and interaction effects and one-way ANOVA *post hoc* analyses. Bold numbers signifies statistical differences after Benjamini correction for multiple comparisons. (\*) signifies variables that satisfied the definition of a general change between walking and running (gait main effect) but that were not identified as a trigger of gait transition. The group mean joint work data can be accessed through the supplementary material found online (Microsoft Excel).

Table 2. Peak instantaneous joint powers

| Variable                      | Two-way ANOVA    |                  |                  | One-way ANOVA    |                  |
|-------------------------------|------------------|------------------|------------------|------------------|------------------|
|                               | Gait             | Speed            | Interaction      | Walking          | Running          |
| Ankle stance (positive) *     | <b>0.002</b>     | <b>&lt;0.001</b> | <b>&lt;0.001</b> | <b>0.005</b>     | <b>&lt;0.001</b> |
| Ankle stance (negative) *     | <b>&lt;0.001</b> | <b>0.004</b>     | 0.202            |                  |                  |
| Knee stance (negative)*       | <b>&lt;0.001</b> | <b>&lt;0.001</b> | 0.542            |                  |                  |
| <b>Hip stance (positive)</b>  | 0.046            | <b>&lt;0.001</b> | <b>0.001</b>     | <b>&lt;0.001</b> | <b>0.004</b>     |
| Hip stance (negative)*        | <b>0.002</b>     | <b>&lt;0.001</b> | 0.257            |                  |                  |
| <b>Ankle swing (positive)</b> | <b>0.015</b>     | <b>0.001</b>     | <b>&lt;0.001</b> | <b>&lt;0.001</b> | 0.576            |
| Knee swing (negative)         | 0.105            | <b>&lt;0.001</b> | 0.385            |                  |                  |
| Hip swing flex. (positive)    | 0.555            | <b>&lt;0.001</b> | <b>&lt;0.001</b> | <b>&lt;0.001</b> | <b>&lt;0.001</b> |

P values for two-way ANOVA main and interaction effects and one-way ANOVA *post hoc* analyses. Bold numbers signifies statistical differences after Benjamini correction for multiple comparisons. Bold variable text signifies variables that are identified as walk-to-run transition triggers. (\*) signifies variables that satisfied the definition of a general change between walking and running (gait main effect) but that were not identified as a trigger of gait transition. The group mean joint power data can be accessed through the supplementary material found online (Microsoft Excel).

Table 3. Peak joint moments

| Variable                      | Two-way ANOVA    |                  |                  | One-way ANOVA    |                  |
|-------------------------------|------------------|------------------|------------------|------------------|------------------|
|                               | Gait             | Speed            | Interaction      | Walking          | Running          |
| Ankle stance plantarflexion * | <b>&lt;0.001</b> | <b>&lt;0.001</b> | <b>&lt;0.001</b> | 0.223            | <b>&lt;0.001</b> |
| Knee stance extension *       | <b>0.001</b>     | <b>&lt;0.001</b> | 0.387            |                  |                  |
| <b>Hip stance flexion</b>     | 0.042            | <b>0.008</b>     | <b>&lt;0.001</b> | <b>&lt;0.001</b> | 0.355            |
| Hip stance extension          | 0.117            | <b>&lt;0.001</b> | <b>0.004</b>     | <b>&lt;0.001</b> | <b>&lt;0.001</b> |
| Ankle swing dorsi-flexion *   | <b>0.001</b>     | <b>&lt;0.001</b> | <b>&lt;0.001</b> | <b>&lt;0.001</b> | <b>0.028</b>     |
| Knee swing flexion            | 0.038            | <b>&lt;0.001</b> | <b>&lt;0.001</b> | <b>&lt;0.001</b> | <b>&lt;0.001</b> |
| Hip swing flexion             | 0.037            | <b>&lt;0.001</b> | 0.047            |                  |                  |
| Hip swing extension           | 0.321            | <b>&lt;0.001</b> | <b>0.008</b>     | <b>&lt;0.001</b> | <b>&lt;0.001</b> |
| Knee stance abduction         | 0.032            | 0.075            | 0.505            |                  |                  |
| Hip stance abduction          | 0.034            | <b>0.013</b>     | 0.387            |                  |                  |

P values for two-way ANOVA main and interaction effects and one-way ANOVA *post hoc* analyses. Bold numbers signifies statistical differences after Benjamini correction for multiple comparisons. Bold variable text signifies variables that are identified as walk-to-run transition triggers. (\*) signifies variables that satisfied the definition of a general change between walking and running (gait main effect) but that were not identified as a trigger of gait transition. The group mean joint moment data can be accessed through the supplementary material found online (Microsoft Excel).

566

568



## Figure Captions

570 **Fig. 1.** Grouped average moments (**A – F**) and instantaneous powers (**G – L**) for the ankle  
(**A, B and G, H**), knee (**C, D and I, J**) and hip (**E, F and K, L**) joints when walking (**A, C, E**  
572 **and G, I, K**) and running (**B, D, F and H, J, L**) at the WRT. The shaded area on the joint  
moments graphs (**A – F**) represent the S.D. of the group means The dark and light shading on  
574 the powers graphs (**G – L**) represent positive and negative joint work, respectively, with  
group S.D. omitted for clarity.  $A_{M1}$  and  $A_{M2}$  (**A-B**) indicate the peak ankle stance-phase  
576 dorsi- and plantarflexion moments respectively. The peak swing-phase moments have not  
been indicated on the graph due to the scale.  $K_{M1}$ , and  $K_{M2}$  indicate the peak knee stance-  
578 phase extension and flexion moments respectively, while  $K_{M3}$ , and  $K_{M4}$  indicate the peak  
knee swing extension and flexion moments, respectively (**C-D**).  $H_{M1}$  and  $H_{M2}$  represent the  
580 peak hip stance-phase extension and flexion moments respectively, while  $H_{M3}$  and  $H_{M4}$   
represent the peak hip swing-phase flexion and extension moments (**E-F**).  $A_{P1}$  and  $A_{P2}$   
582 represent the peak positive and negative ankle stance-phase power (**G-H**). The swing-phase  
power has been not been indicated due to the scale.  $K_{P1}$  indicates the peak positive knee  
584 stance power, and  $K_{P2}$  and  $K_{P3}$  indicate the peak negative knee stance and swing power,  
respectively (**I-J**).  $H_{P1}$  and  $H_{P2}$  represent the peak positive and negative hip stance power,  
586 respectively, and  $H_{P3}$  and  $H_{P4}$  represent the peak positive hip swing power during flexion and  
extension, respectively. The negative knee swing flexion work (performed during net flexion  
588 moments in terminal swing) was computed from the  $K_{P3}$  power burst; the positive hip stance  
extension work and negative flexion work (performed during net extension and flexion  
590 moments, respectively) were computed from the  $H_{P1}$  and  $H_{P2}$  power bursts, respectively; the  
positive hip swing flexion work (performed during net flexion moments in early swing) was  
592 computed from the  $H_{P3}$  power burst.

594 **Fig. 2.** Joint work (mean  $\pm$  S.D.) during walking (closed symbols) and running (open  
symbols) plotted against speed (expressed as a per cent of the WRT speed; 100% depicted by  
596 the broken vertical line). Positive and negative ankle (**A**), negative knee (**B**), and positive hip  
stance extension work and negative flexion work (performed during net extension and flexion  
598 moments, respectively) (**C**). Positive ankle swing dorsi-flexion work (performed during net  
dorsi-flexion moments in swing) (**D**), negative knee swing flexion work (performed during  
600 net flexion moments in terminal swing) (**E**), and positive hip swing flexion work (performed  
during net flexion moments in early swing) (**F**). (#) indicates speeds where walking was

602 significantly greater than running (*a priori tests*). (\*) indicates significant differences between  
walking and running established in *post hoc* analyses (run only when an interaction effect  
604 between gait and speed was found). If both *a priori* and *post hoc* significant differences were  
found only the (\*) is labelled.

606 **Fig. 3.** Peak instantaneous joint power (mean  $\pm$  S.D.) during walking (closed symbols) and  
running (open symbols) plotted against speed (expressed as a per cent of the WRT speed;  
608 100% depicted by the broken vertical line). Peak positive and negative ankle (**A**), negative  
knee (**B**), and positive and negative hip stance powers (**C**). Peak positive ankle swing power  
610 (**D**), peak negative knee swing power (**E**) and peak positive hip swing power in flexion (**F**).  
Circles and squares represent peak positive and negative power, respectively. The (‡) next to  
612 the graph heading indicates the variable was identified as a WRT trigger. (#) indicates speeds  
where walking was significantly greater than running (*a priori tests*). (\*) indicates significant  
614 differences between walking and running established in *post hoc* analyses (run only when an  
interaction effect between gait and speed was found). If both *a priori* and *post hoc* significant  
616 differences were found only the (\*) is labelled.

618 **Fig. 4.** Peak joint moments (mean  $\pm$  S.D.) during walking (closed symbols) and running  
(open symbols) plotted against speed (expressed as a per cent of the WRT speed; 100%  
620 depicted by the broken vertical line). Peak ankle stance-phase plantarflexion moments (**A**).  
Peak knee stance-phase extension (**B**), and hip stance-phase flexion and extension moments  
622 (**C**). Peak ankle swing-phase dorsiflexion moments (**D**). Peak knee swing-phase flexion  
moments (**E**), and hip swing-phase flexion and extension moments (**E-F**). Peak knee and hip  
624 stance-phase abduction moments (**G – H**). Positive values (circles) represent net joint flexion  
moments (dorsi-flexion at the ankle). Negative values (squares) represent net joint extension  
626 moments (plantarflexion at the ankle, abduction at the knee and hip). The (‡) next to the  
graph heading indicates the variable was identified as a WRT trigger. (#) indicates speeds  
628 where walking was significantly greater than running (*a priori tests*). (\*) indicates significant  
differences between walking and running established in *post hoc* analyses (run only when an  
630 interaction effect between gait and speed was found). If both *a priori* and *post hoc* significant  
differences were found only the (\*) is labelled.

**Fig. 1**

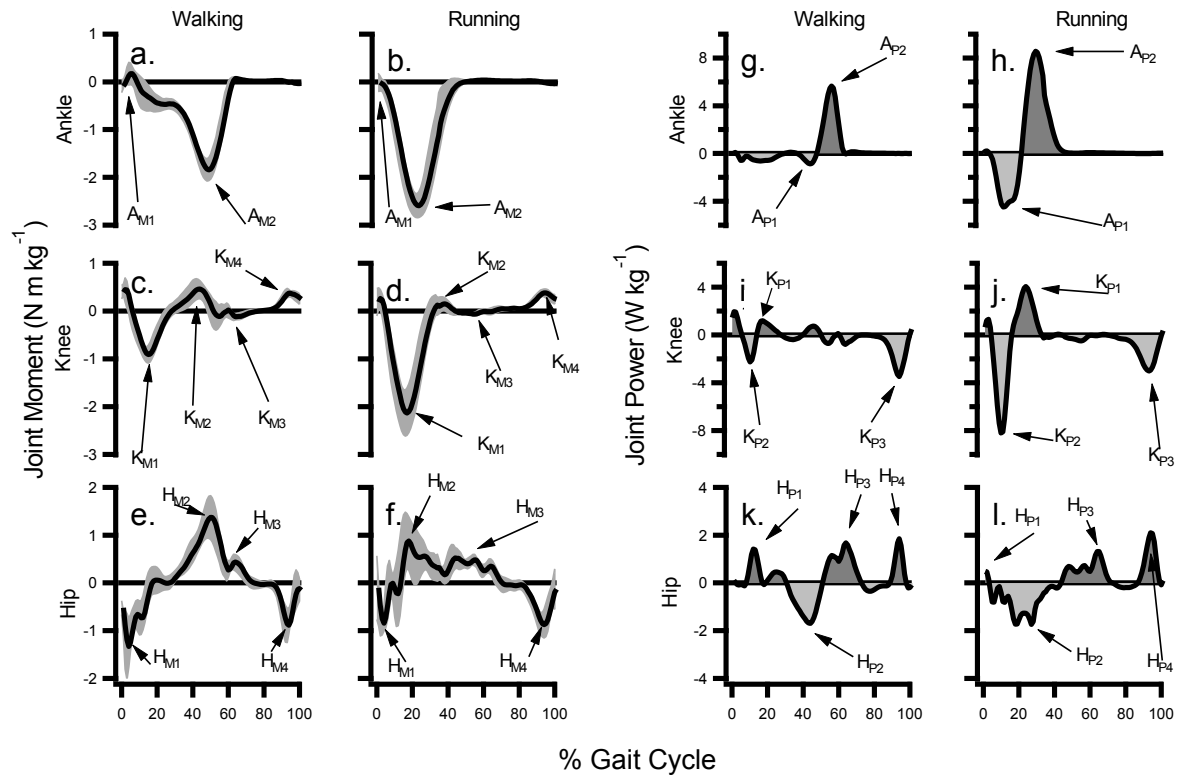

Fig. 2

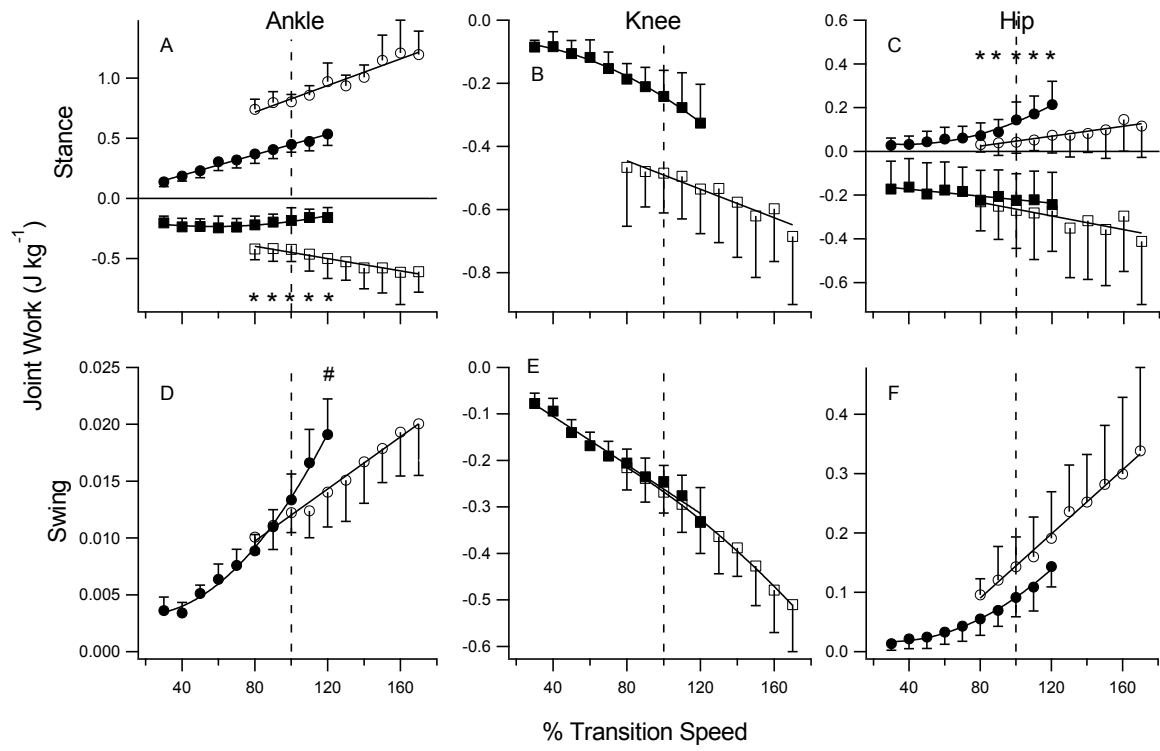

Fig. 3

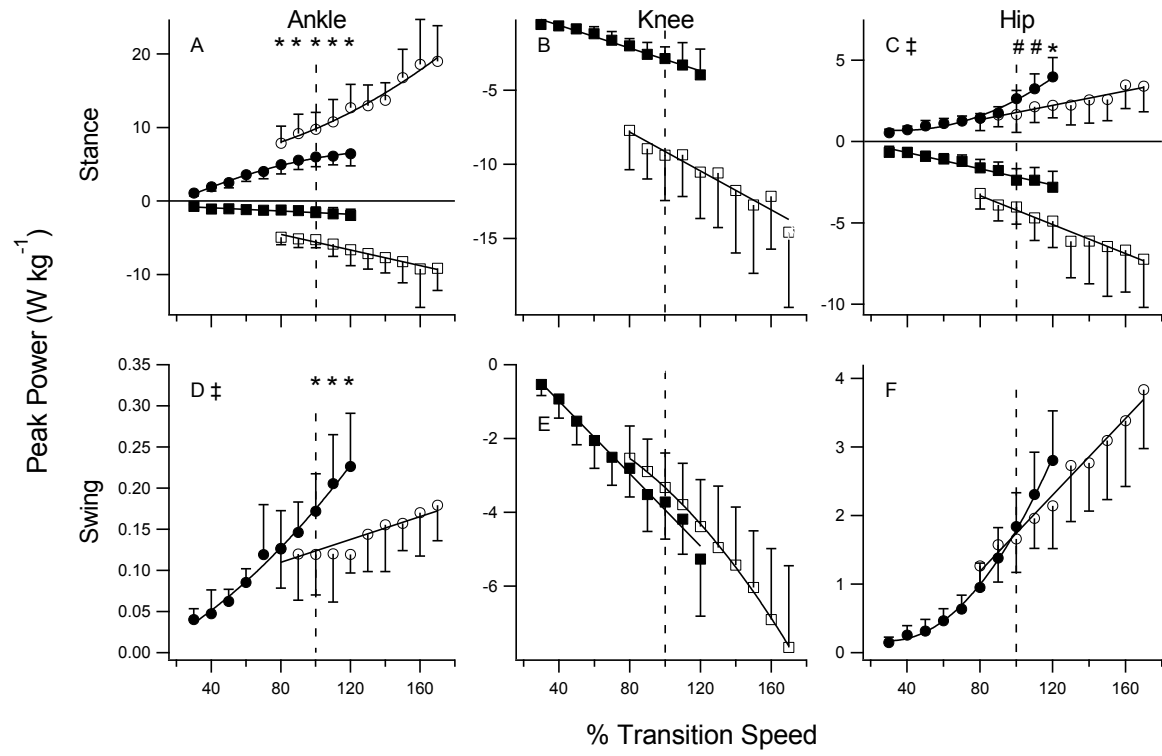

**Fig. 4**

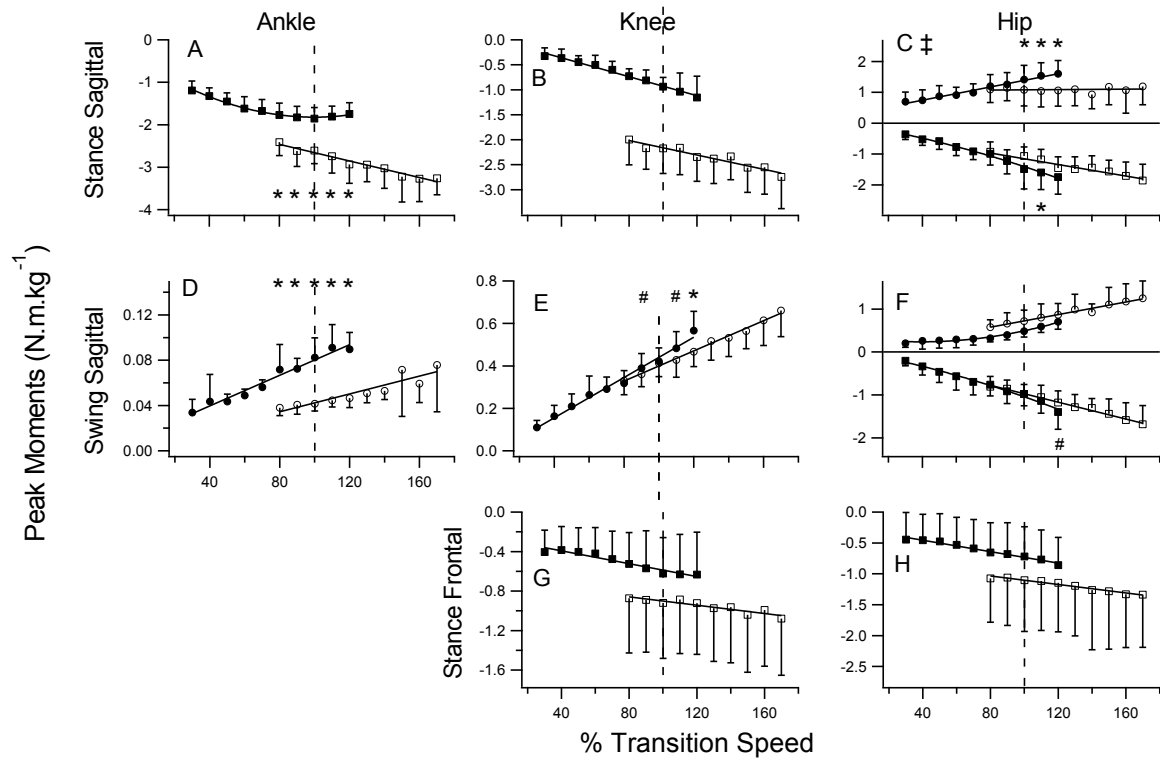

Source: https://cob.silverchair.com/jeb/article-pdf/doi/10.1242/jeb.107599/2037868/jeb_107599.pdf
